# Supplementary material for: Triple-Negative Breast Cancer Patients Treated at MD Anderson Cancer Center in Phase I Trials: Improved Outcomes with Combination Chemotherapy and Targeted Agents
Source: Oxford University Press journal article supplement (doi:10.1158/1535-7163.mct-14-0358), 2014-09-25
Supplement: 15357163mct140358-sup-130676_1_supp_2543725_n98jp4.doc [file 15357163mct140358-sup-130676_1_supp_2543725_n98jp4.doc]

Supplementary Table S1: Description of targeted therapies used in various phase I trials involved in various phase I trials (n=106)

| Description of targeted agents used in phase I protocol | Treated | Evaluable | CR | PR | SD | PD | SD≥6mo/PR/CR,  n (%) |
| --- | --- | --- | --- | --- | --- | --- | --- |
| PI3K/AKT/mTOR pathway directed a, c | 39 | 38 | 1 | 5 | 23 | 9 | 7 (18) |
| Anti-angiogenicagentsb,d | 38 | 36 | 1 | 3 | 21 | 11 | 7 (19) |
| Dasatinibb | 14 | 11 | 0 | 1 | 1 | 9 | 1 (9) |
| Epigenetic targeted drugs a,e | 14 | 13 | 0 | 0 | 4 | 9 | 0 |
| Aurorakinase inhibitor | 3 | 3 | 0 | 1 | 0 | 2 | 1f (33) |
| EGFR TKI | 2 | 2 | 0 | 0 | 0 | 2 | 0 |
| FGFR TKI | 1 | 1 | 0 | 0 | 0 | 1 | 0 |
| Gammasecretase inhibitor | 2 | 2 | 0 | 0 | 0 | 2 | 0 |
| IGFR TKIg | 5 | 5 | 0 | 0 | 3 | 2 | 1f (33) |
| MDM2 inhibitor | 1 | 1 | 0 | 0 | 0 | 1 | 0 |
| MEK inhibitor | 1 | 0 | 0 | 0 | 0 | 0 | 0 |
| Mitochondrial scavenger | 7 | 7 | 0 | 0 | 1 | 6 | 0 |
| PARP inhibitor | 2 | 2 | 0 | 0 | 0 | 2 | 0 |
| Proteasome inhibitor | 2 | 2 | 0 | 0 | 1 | 1 | 0 |

| aalone or in combination |
| --- |
| balways in combination |
| cMTORC1 inhibitors (n=35), PI3K inhibitors (n=2), combination of mTOR inhibitor and AKT inhibitor (n=2) |
| dbevacizumab (n=34), pazopanib ( n=2), sorafenib (n=1), anti-HIF1(n=1) |
| evalproic acid (n=10), decitabine (n=3), azacytidine (n=1) |
| fwith chemotherapy in combination |
| gwithmTOR inhibitor in combination (n=2) |

Abbreviations: CR, complete response; EGFR, epidermal growth factor receptor; FGFR, fibroblast growth factor receptor; IGFR, insulin-like growth factor receptor; mo, months; PR, partial response; PFS, progression-free survival; SD, stable disease; TKI, tyrosine kinase inihibitor
